# Supplementary material
Source: PubMed Central journal article supplement (PMC9514390)
Supplement: NIHMS1815067-supplement-3.pdf [file NIHMS1815067-supplement-3.pdf]

**Date Reported:** Thursday, September 9, 2021

**Cell Line Sex:** Female

**Cell Line:** HT940

**Reason for Testing:** retesting samples since it was failed.

**Submitted Passage #:** 13

**Date of Sample:** 8/20/2021

**Investigator:** Guibin Chen, NIH

**Specimen:** Human iPSC

**Results:** 46,XX

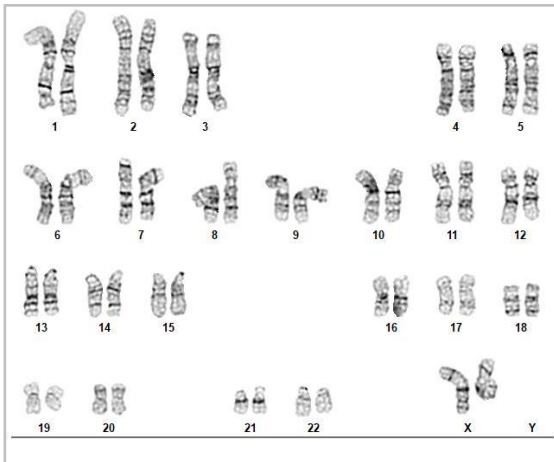

**Cell:** 25

**Slide:** G02

**Slide Type:** Karyotype

**Total Counted:** 20

**Total Analyzed:** 8

**Total Karyogrammed:** 4

**Band Resolution:** 500 - 550

**Interpretation:**

**This is a normal karyotype; no clonal abnormalities were detected at the stated band level of resolution.**

**Completed by:** Kate Bird, CG(ASCP)

**Reviewed and Interpreted by:** Vanessa Horner, PhD, FACMG

**Date:** \_\_\_\_\_ **Sent By:** \_\_\_\_\_ **Sent To:** \_\_\_\_\_ **QC Review By:** \_\_\_\_\_

*Limitations: This assay allows for microscopic visualization of numerical and structural chromosome abnormalities. The size of structural abnormality that can be detected is >3-10Mb, dependent upon the G-band resolution obtained from this specimen. For the purposes of this report, band level is defined as the number of G-bands per haploid genome. It is documented here as "band level", i.e., the range of bands determined from the four karyograms in this assay. Detection of heterogeneity of clonal cell populations in this specimen (i.e., mosaicism) is limited by the number of metaphase cells examined, documented here as "# of cells counted".*

*This assay was conducted solely for listed investigator/institution. The results of this assay are for research use only. Unless otherwise mutually agreed in writing, the services provided to you hereunder by WiCell Research Institute, Inc. ("WiCell") are governed solely by WiCell's Terms and Conditions of Service, found at [www.wicell.org/privacyandterms](http://www.wicell.org/privacyandterms). Any terms you may attach to a purchase order or other document that are inconsistent, add to, or conflict with WiCell's Terms and Conditions of Service are null and void and of no legal force or effect.*
